# Supplementary material for: Exploiting a Reduced Set of Weighted Average Features to Improve Prediction of DNA-Binding Residues from 3D Structures
Source: PubMed Central journal article supplement (PMC3234263; doi:10.1371/journal.pone.0028440), 2011-12-08
Supplement: pone.0028440.s001.pdf [file pone.0028440.s001.pdf]

## Supporting Information Table S1

In addition to betweenness centrality (*BC*), we analyzed the predictive power of other two types of centrality measures [1]: degree centrality (*DC*) and closeness centrality (*CC*).

### Degree centrality

The degree centrality of a vertex is defined as the number of edges that connect the vertex with its neighboring vertices within the contact graph of a protein chain.

### Closeness centrality

Closeness centrality is calculated as the reciprocal of the average geodesic distance (i.e., the shortest path) between a vertex  $v$  and any other vertex  $t$  within the contact graph  $G$  of a protein chain of length  $n$ :

$$CC(v) = \frac{n-1}{\sum_{t \in V \setminus v} d_G(v, t)}$$

**Table S1.** Predictive power of individual centrality measure on the DBP-123 dataset by 5-fold cross validation.

| Feature | Recall (%) | Precision (%) | F <sub>1</sub> | PR-AUC       |
|---------|------------|---------------|----------------|--------------|
| BC      | 36.8       | 21.9          | 0.274          | 0.208        |
| WBC     | 65.1       | 22.6          | 0.333          | <b>0.228</b> |
| CC      | 58.4       | 20.1          | 0.299          | 0.202        |
| WCC     | 68.9       | 19.8          | 0.307          | 0.206        |
| DC      | 50.9       | 16.8          | 0.248          | 0.168        |
| WDC     | 46.0       | 18.7          | 0.255          | 0.205        |

## References

1. Maetschke SR, Yuan Z (2009) Exploiting structural and topological information to improve prediction of RNA-protein binding sites. *BMC Bioinformatics* 10: 341.
