# Supplementary material for: Exploiting a Reduced Set of Weighted Average Features to Improve Prediction of DNA-Binding Residues from 3D Structures
Source: PubMed Central journal article supplement (PMC3234263; doi:10.1371/journal.pone.0028440), 2011-12-08
Supplement: pone.0028440.s002.pdf [file pone.0028440.s002.pdf]

## Supporting Information Table S2

**Table S2.** Methodological differences between DISPLAR, our previous method and our present method (DBPSite).

| Difference                                                    | DISPLAR [1]                                   | Our previous method [2]                                                                | Our present method (DBPSite)                                |
|---------------------------------------------------------------|-----------------------------------------------|----------------------------------------------------------------------------------------|-------------------------------------------------------------|
| Features analyzed and used                                    | PSSM, Solvent accessibility                   | PSSM, Solvent accessibility, Side chain pK <sub>a</sub> , Packing density and B-factor | PSSM, Side chain ASA, Propensity and Betweenness centrality |
| Distance of neighboring residues                              | No                                            | No                                                                                     | Yes                                                         |
| Global topological measure of the protein structure network   | No                                            | No                                                                                     | Yes                                                         |
| Side chain information                                        | No                                            | Yes (side chain pK <sub>a</sub> )                                                      | Yes (side chain ASA)                                        |
| Feature extraction method                                     | Concatenated encoding of neighboring residues | Concatenated encoding of neighboring residues                                          | Weighted average encoding of neighboring residues           |
| Dimensionality of encoding vectors                            | 315                                           | 253                                                                                    | 43                                                          |
| Threshold-dependent evaluation measure                        | No                                            | Yes (ROC-AUC)                                                                          | Yes (PR-AUC)                                                |
| Significance of the difference between methods for comparison | No                                            | No                                                                                     | Yes                                                         |

## References

1. Tjong H, Zhou HX (2007) DISPLAR: an accurate method for predicting DNA-binding sites on protein surfaces. *Nucleic Acids Res* 35: 1465-1477.
2. Xiong Y, Liu J, Wei DQ (2011) An accurate feature-based method for identifying DNA-binding residues on protein surfaces. *Proteins-Structure Function and Bioinformatics* 79: 509-517.
